# Supplementary material for: More Evidence of Collusion: a New Prophage-Mediated Viral Defense System Encoded by Mycobacteriophage Sbash
Source: PubMed Central journal article supplement (PMC6426596; doi:10.1128/mbio.00196-19), 2019-03-19
Supplement: mBio.00196-19-sf001.pdf [file mBio.00196-19-sf001.pdf]

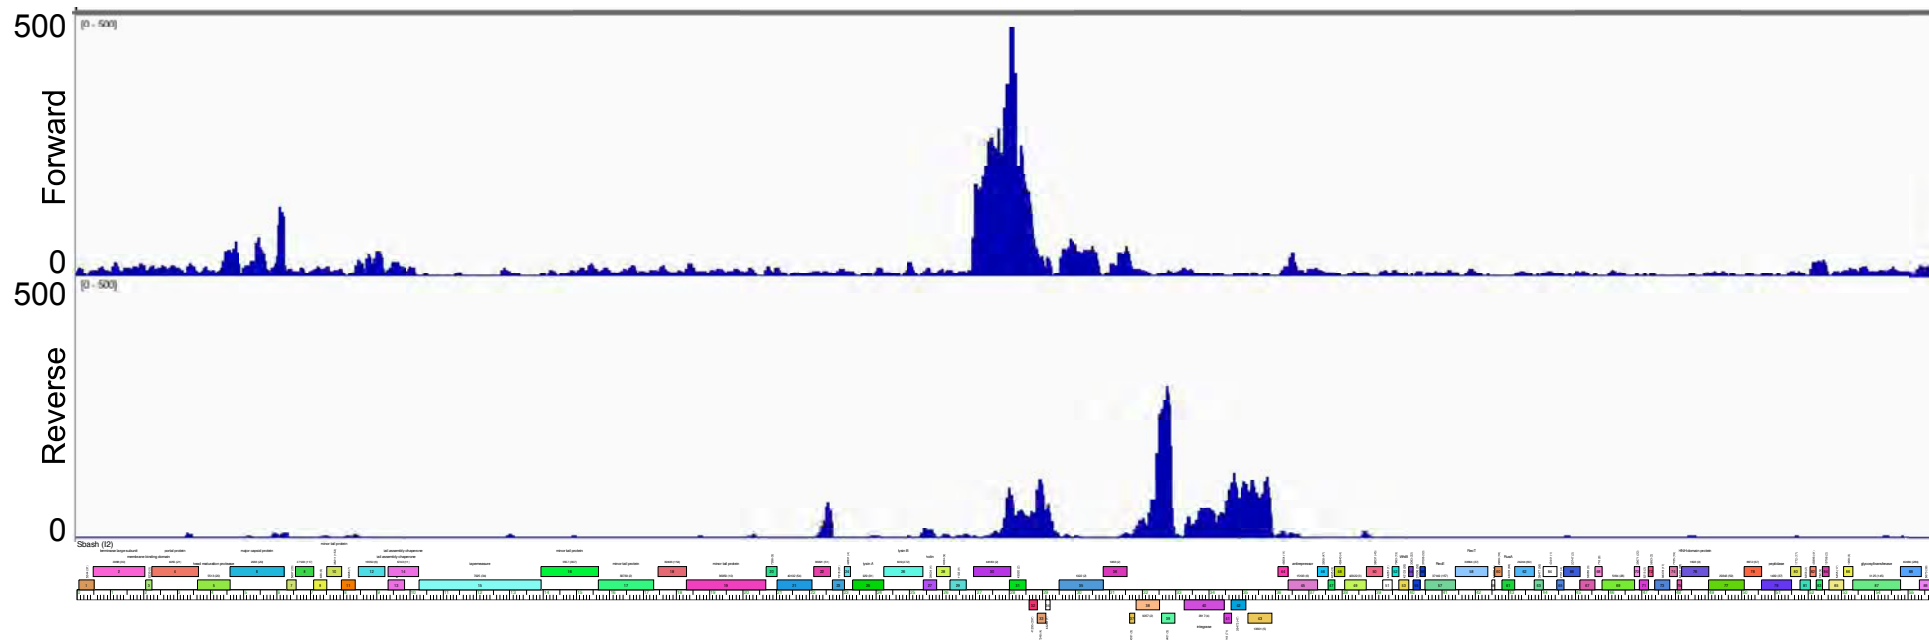

Figure S1
