# Supplementary material for: More Evidence of Collusion: a New Prophage-Mediated Viral Defense System Encoded by Mycobacteriophage Sbash
Source: PubMed Central journal article supplement (PMC6426596; doi:10.1128/mbio.00196-19), 2019-03-19
Supplement: mBio.00196-19-st001.pdf [file mBio.00196-19-st001.pdf]

Table S1. Oligonucleotide primers used in this study

| Primer               | Sequence                                            |
|----------------------|-----------------------------------------------------|
| pGG01 FWD            | ATACGACTCACTATAGGGAAATCGACAACCGCCCCGAC              |
| pGG01 REV            | AGTCGACCTGCAGGCATGCACGGCGGCCATCGACCCCT              |
| pGG02 FWD            | ATACGACTCACTATAGGGAAAATAAGGGTGTAGGTCAAC             |
| pGG02 REV            | AGTCGACCTGCAGGCATGCAGTGCAGGATTCGAACCTG              |
| pGG03 FWD            | ATACGACTCACTATAGGGAAACGCAATGACACGCATATAAATACTGGTGGG |
| pGG03 REV            | AGTCGACCTGCAGGCATGCACCCGCCTCCCCAAAGCC               |
| pGG04 FWD            | ATACGACTCACTATAGGGGAATTCCTCCTTTCCGCCTGC             |
| pGG04 REV            | AGTCGACCTGCAGGCATGCACACACAGGAGATTTGAGTACGAC         |
| pGG05 FWD            | ATACGACTCACTATAGGGAAACCGGCGAACCCATCGACAAC           |
| pGG05 REV            | AGTCGACCTGCAGGCATGCAGGCATTCGGCGGCCATCG              |
| pGG06 FWD            | ATACGACTCACTATAGGGAAACGCGCATGCCTTTGCCCT             |
| pGG06 REV            | AGTCGACCTGCAGGCATGCAAACCAAACAGGCCCCCTC              |
| pGG07 FWD            | ATACGACTCACTATAGGGGAAGCCCGATGAAGCTAGATG             |
| pGG07 REV            | AGTCGACCTGCAGGCATGCAATCCCCGAAGATACACCG              |
| pGG08 FWD            | ATACGACTCACTATAGGGGAATCAGCCATCGGCTCGTCC             |
| pGG08 REV            | AGTCGACCTGCAGGCATGCACACAGATGTAATTGCTGGTCACG         |
| pGG09 FWD            | ATACGACTCACTATAGGGGAATCAGCCATCGGCTCGTCC             |
| pGG09 REV            | AGTCGACCTGCAGGCATGCAATCCCCGAAGATACACCGTAG           |
| pGG10 FWD            | ATACGACTCACTATAGGGAAACCGGCGAACCCATCGACA             |
| pGG10 REV            | AGTCGACCTGCAGGCATGCATCATGCGGTGTCCTCCAGTC            |
| pGG21 FWD            | ATACGACTCACTATAGGGGAAGCCGGGAGCATACTTCCG             |
| pGG21 REV            | AGTCGACCTGCAGGCATGCAAACCAAACAGGCCCCCTC              |
| pGG22 FWD            | ATACGACTCACTATAGGGGAATTCCTCCTTTCCGCCTGC             |
| pGG22 REV            | AGTCGACCTGCAGGCATGCATCATTGTGGCGGTACCAC              |
| pGG24 FWD            | ATGACGCAGCCTCTGCGG                                  |
| pGG24 REV            | TTGTTCGCATCCCCCTTGAAC                               |
| pGG36 FWD            | GATTCGCCGCCCGAAATCACGACCGATGAACCTGATCAAGATGAC       |
| pGG36 REV            | GCGTTTAAACCTGCAGGCACTCATCTGGGCACTCCGGC              |
| pGG37 FWD            | GATTCGCCGCCCGAAATCACTAAAAGGCGGTGGCTGAAC             |
| pGG37 REV            | GCGTTTAAACCTGCAGGCACCTACTTCATGAGGCCGAG              |
| pGG38 FWD            | GATTCGCCGCCCGAAATCACGACGAGAGGAACCACCTAAAATG         |
| pGG38 REV            | GCGTTTAAACCTGCAGGCACTTAGGCGCAAACCTTACG              |
| LilD136_ptnd_Fwd     | GATTCGCCGCCCGAAATCACCGACGAGAGGAACCATCG              |
| Wilder140_ptnd_Fwd   | GATTCGCCGCCCGAAATCACCGACGAGAGGAACCACCG              |
| Wilder_LilD_ptnd_Rev | GCGTTTAAACCTGCAGGCACCTAGGCGCAAACCTTACG              |
