# Supplementary material for: More Evidence of Collusion: a New Prophage-Mediated Viral Defense System Encoded by Mycobacteriophage Sbash
Source: PubMed Central journal article supplement (PMC6426596; doi:10.1128/mbio.00196-19), 2019-03-19
Supplement: mBio.00196-19-st003.pdf [file mBio.00196-19-st003.pdf]

Table S3. DNA substrates and primers using for phage engineering

| Name               | G-block coordinates <sup>1</sup>    | Primers <sup>2</sup>                                                                                                 | Deletion Coordinates <sup>3</sup> |
|--------------------|-------------------------------------|----------------------------------------------------------------------------------------------------------------------|-----------------------------------|
| SbashΔ30           | 26,704 – 26,953;<br>28,001 – 28,250 | Sbash30KO FWD:<br>GATGACTGACCGGCGAACCCATC<br><br>Sbash30KO REV:<br>CCACGGCTCGCTACCGCC                                | 26,954 – 28,000                   |
| SbashΔ31           | 27,812 – 28,061;<br>28,488 – 28,702 | Sbash31KO FWD:<br>ACGATGACGATCGTGATGGATGGCG<br><br>Sbash31KO REV:<br>ACAGTGC GCGGCTGGACC                             | 28,062 – 28,487                   |
| SbashΔ34           | 28,865 – 29,108;<br>29,223 – 29,472 | Sbash34KO FWD:<br>GCGACGCGGTTGCCGATCT<br><br>Sbash34KO REV:<br>CTACCGGGATACGCTACCGCCG                                | 29,109 – 29,222                   |
| SbashΔ35           | 29,273 – 29,522;<br>30,810 – 31,059 | Sbash35KO FWD:<br>GACTTTACCCTAAGCAAGGGTGTAGTTC<br><br>Sbash35KO REV:<br>GATGTGATCGCGCCTCGAG                          | 29,523 – 30,809                   |
| SbashΔ37           | 31,380 – 31,629;<br>31,765 – 32,014 | Sbash37KO FWD:<br>ACATCCGCGACGGAATCTCGTT<br><br>Sbash37KO REV:<br>GGGTGATGACTACTGCGCGC                               | 31,630 – 31,764                   |
| SbashΔ38           | 31,586 – 31,835;<br>32,499 – 32,748 | Sbash38KO FWD:<br>CGAAAGGGTGTAGTCGTA CTCAAATCTCCT<br><br>Sbash38KO REV:<br>ACCACCATCGGCATCATCCAGC                    | 31,836 – 32,498                   |
| SbashΔ39           | 32,352 – 32,601;<br>32,959 – 33,208 | Sbash39KO FWD:<br>CGCGATGGACGTGATCCAGAACG<br><br>Sbash39KO REV:<br>GATTCGAACCTGCGTAGGCGTAAGC                         | 32,602-32,958                     |
| CrossroadsΔ132     | 68,020 – 68,269;<br>69,080 – 69,329 | Crossroads132KO FWD:<br>CCAGTCTGGCGGCTGGTCGG<br><br>Crossroads132KO REV:<br>TCAACCCTGGCGCTCGCGG                      | 68,270 – 69,079                   |
| CrossroadsΔ141     | 72,778 – 73,027;<br>74,228 – 74,477 | Crossroads141KO FWD:<br>CCGTGGTTCGTGACCTTCATTTTCGT<br><br>Crossroads141KO REV:<br>CGCTGGCTTAAGCGTCGCTAGT             | 73,028 – 74,227                   |
| CrossroadsΔ140-141 | 71,743-71,942;<br>74,249-74,448     | Crossroads140_141KO_Fwd_V2:<br>GCCATGCGACGGGGACCG<br><br>Crossroads140_141KO_Rev_V2:<br>GATACCGACACATAACGAGACCTAAGCG | 71,943-74,248                     |
| CrossroadsΔ139-141 | 70,510-70,766;<br>74,273-74,515     | CrossroadsKO139_141_Fwd:<br>CGTCGTCTGCCTCGGTGTC<br><br>CrossroadsKO139_141_Rev:<br>GACACGAACCAAGCAGCTC               | 70,767-74,272                     |

<sup>1</sup>Each G-block was designed to include ~250bp upstream and downstream of the deletion end points, and the coordinates for each are shown.

<sup>2</sup>Primers are designed to anneal to the flanks of the G-block substrate and were used to amplify the substrate prior to co-electroporation with phage genomic DNA.

<sup>3</sup>Deletion coordinates correspond to the wild-type phage sequence
